# Supplementary material for: Time-reversal-breaking Weyl nodal lines in two-dimensional A3C2 (A = Ti, Zr, and Hf) intrinsically ferromagnetic materials with high Curie temperature
Source: Royal Society of Chemistry journal article supplement (doi:10.1039/d1nr00139f), 2021-01-01
Supplement: d1nr00139f1.pdf [file d1nr00139f1.pdf]

**Structural model and atomic positions**

Table S1: Structural models and atomic positions for  $A_3C_2$  systems.

| Systems   | a (Å) | b (Å) | c (Å)  | Atomic positions                                                                         |
|-----------|-------|-------|--------|------------------------------------------------------------------------------------------|
| $Ti_3C_2$ | 3.099 | 3.099 | 19.318 | Ti: 2i (0.667, 0.333, 0.379);<br>Ti: 1b (0.0, 0.0, 0.5);<br>C: 2h (0.333, 0.667, 0.569). |
| $Zr_3C_2$ | 3.369 | 3.369 | 20.289 | Zr: 2i (0.667, 0.333, 0.369);<br>Zr: 1b (0.0, 0.0, 0.5);<br>C: 2h (0.333, 0.667, 0.574). |
| $Hf_3C_2$ | 3.317 | 3.317 | 19.859 | Hf: 2i (0.667, 0.333, 0.370);<br>Hf: 1b (0.0, 0.0, 0.5);<br>C: 2h (0.333, 0.667, 0.569). |

## The Hamiltonian of the classical Heisenberg model

We performed a Monte Carlo simulation to estimate the Curie temperature of the  $A_3C_2$  systems. The simulation is based on the Ising model.

The Hamiltonian of the classical Heisenberg model can be shown to be

$$H = -\sum_{i,j} J_1 N_i N_j - \sum_{k,l} J_2 N_k N_l \quad (1),$$

where  $J_1$  and  $J_2$  are the first and second nearest-neighbor exchange parameters, respectively. For  $A_3C_2$  with the  $P\bar{6}m2$  type structure, we construct a  $50 \times 50$  supercell.  $J_1$  and  $J_2$  are estimated by the following formulas:

$$E(FM) = -24J_1N^2 - 4J_2N^2 \quad (2)$$

$$E(AFM1) = -24J_1N^2 + 4J_2N^2 \quad (3)$$

$$E(AFM2) = 8J_1N^2 - 4J_2N^2 \quad (4)$$

$$\Delta E_2 = E(AFM1) - E(FM) = 8J_2N^2 \quad (5)$$

$$\Delta E_1 = E(AFM2) - E(FM) = 32J_1N^2 \quad (6)$$

$$J_1 = \frac{\Delta E_1}{32N^2} \quad (7)$$

$$J_2 = \frac{\Delta E_2}{8N^2} \quad (8)$$

Table S2: Structural models, atomic positions, and total magnetism for  $A_3C_2$  systems.

| Systems   | $J_1$ (meV) | $J_2$ (meV) |
|-----------|-------------|-------------|
| $Ti_3C_2$ | 14.0        | 21.3        |
| $Zr_3C_2$ | 13.3        | 18.9        |
| $Hf_3C_2$ | 5.5         | 13.4        |

Table S3: Curie temperature estimated by Monte Carlo simulation with different  $U$  parameters ( $U = 1-3$  eV) for  $A_3C_2$  systems.

| $T_C$ (K) | $U = 1$ eV | $U = 2$ eV | $U = 3$ eV |
|-----------|------------|------------|------------|
| $Ti_3C_2$ | 972        | 972        | 984        |
| $Zr_3C_2$ | 656        | 652        | 644        |
| $Hf_3C_2$ | 340        | 364        | 412        |

Table S4: Calculated total and atomic magnetic moments for  $A_3C_2$  systems.

| Systems   | Total magnetic moment ( $\mu_B$ ) | Atomic magnetic moment (AMM) ( $\mu_B$ ) | AMM ( $\mu_B$ ) | AMM ( $\mu_B$ ) |
|-----------|-----------------------------------|------------------------------------------|-----------------|-----------------|
| $Ti_3C_2$ | 1.95                              | Ti (2i) : 0.975                          | Ti (1b) : 0     | C (2h) : 0      |
| $Zr_3C_2$ | 1.95                              | Zr (2i) : 0.975                          | Zr (1b) : 0     | C (2h) : 0      |
| $Hf_3C_2$ | 1.50                              | Hf (2i) : 0.75                           | Hf (1b) : 0     | C (2h) : 0      |

## Magnetic anisotropy energy (MAE) difference

Table S5: magnetic anisotropy energy (MAE) difference between the [100] and [001] direction for  $\text{Ti}_3\text{C}_2$ . SOC is added during the calculations.

|             | U = 0 eV            | U = 1 eV            | U = 2 eV            | U = 3 eV            |
|-------------|---------------------|---------------------|---------------------|---------------------|
| [100]-[001] | 19.6 $\mu\text{eV}$ | 18.7 $\mu\text{eV}$ | 18.5 $\mu\text{eV}$ | 18.3 $\mu\text{eV}$ |

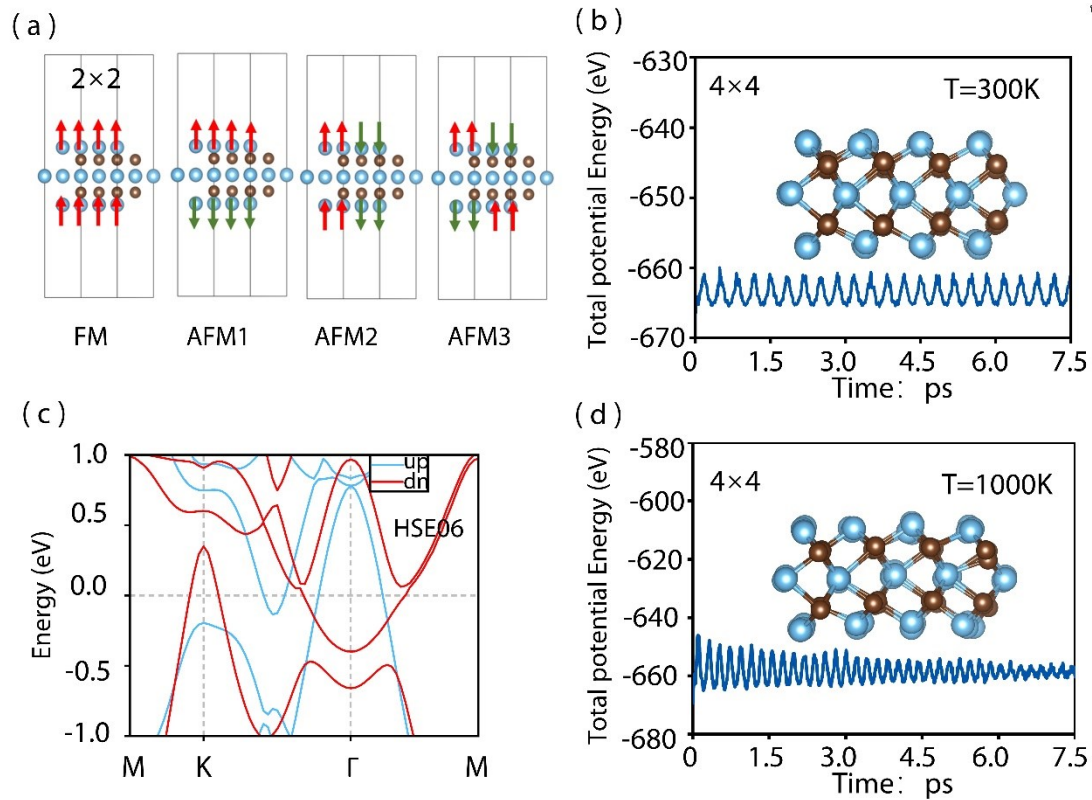

Figure S1. (a)  $2 \times 2$  supercell of  $\text{A}_3\text{C}_2$  and different magnetic states, with the arrows showing the spin direction of the A (A = Ti, Zr, and Hf) atoms; (b)/(d) the total potential energy fluctuation of  $\text{Ti}_3\text{C}_2$  during the *ab initio* molecular dynamics (AIMD) simulation at 300 K/1000K, with the inset showing the atomic configuration of  $\text{Ti}_3\text{C}_2$  after 7.5 ps of AIMD simulation at 300 K/1000K; (c) spin-polarized band structure of  $\text{Ti}_3\text{C}_2$  calculated via the HSE 06 method.

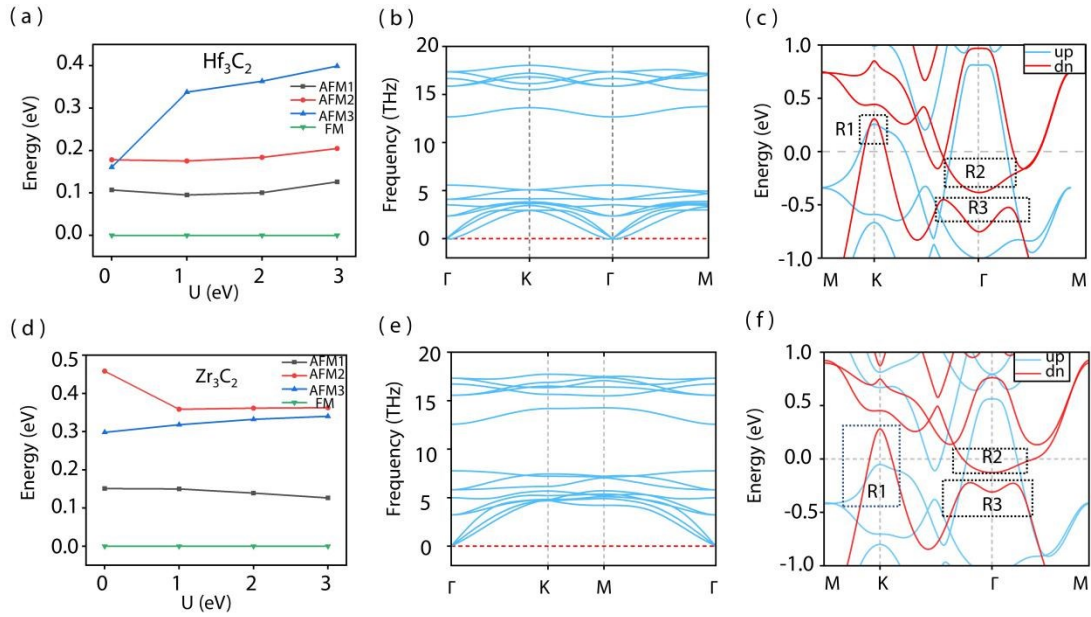

Figure S2. (a) Total energies of  $\text{Hf}_3\text{C}_2$  in the FM and AFM1-3 magnetic states (with the energy of FM set to 0 eV); (b) calculated phonon dispersion of  $\text{Hf}_3\text{C}_2$ ; (c) spin-polarized band structure of  $\text{Hf}_3\text{C}_2$ ; (d) total energies of  $\text{Zr}_3\text{C}_2$  in the FM and AFM1-3 magnetic states (with the energy of FM is set to 0 eV); (e) calculated phonon dispersion of  $\text{Zr}_3\text{C}_2$ ; (f) spin-polarized band structure of  $\text{Zr}_3\text{C}_2$ .

### Edge states

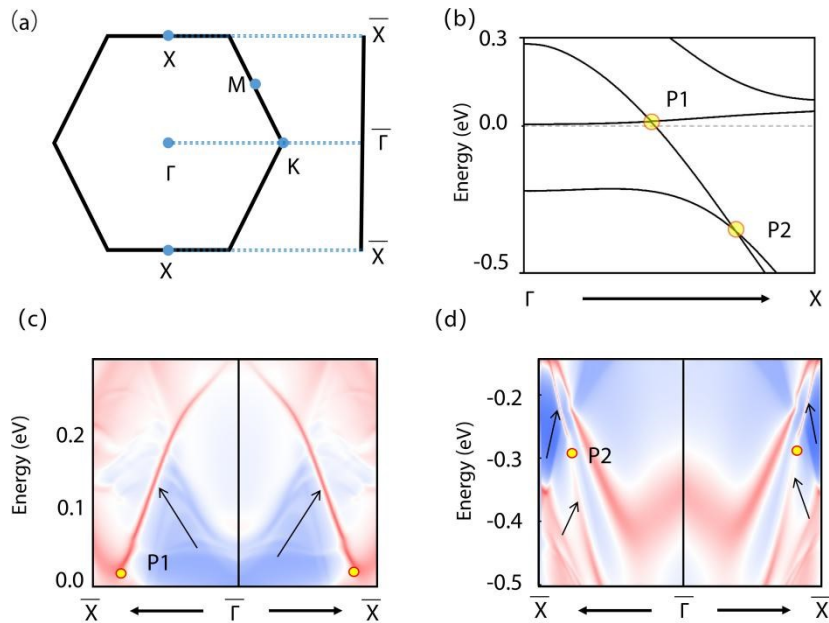

Figure S3 (a) the 2D BZ and the projection onto the (010) edge; (b) Band structures along the  $\Gamma$ -X; (c) and (d) The projection spectrum on the edge of (010). SOC is added during the calculations.

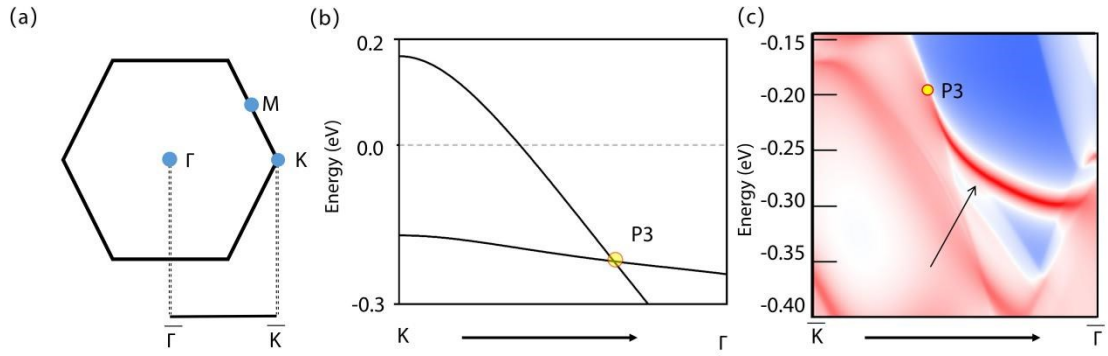

Figure S4 (a) the 2D BZ and the projection onto the (110) edge; (b) Band structures along the K- $\Gamma$  path; (c) and (d) The projection spectrum on the edge of (110). SOC is added during the calculations.

In 3D nodal-line semimetals, nodal lines are characterized by nontrivial drumhead surface states. Here, we calculate the edge states for the  $\text{Ti}_3\text{C}_2$  monolayer. The results of (010) and (110) edge are shown in Figure S3 and Figure S4, respectively. Based on the energy range of the nodal lines in Figure S3(b) and Figure S4(b), edge states in Figure S3(c), Figure S3(d) and Figure S4(c) correspond to nodal lines in R2, R3 and R1 respectively.

## Types of nodal lines

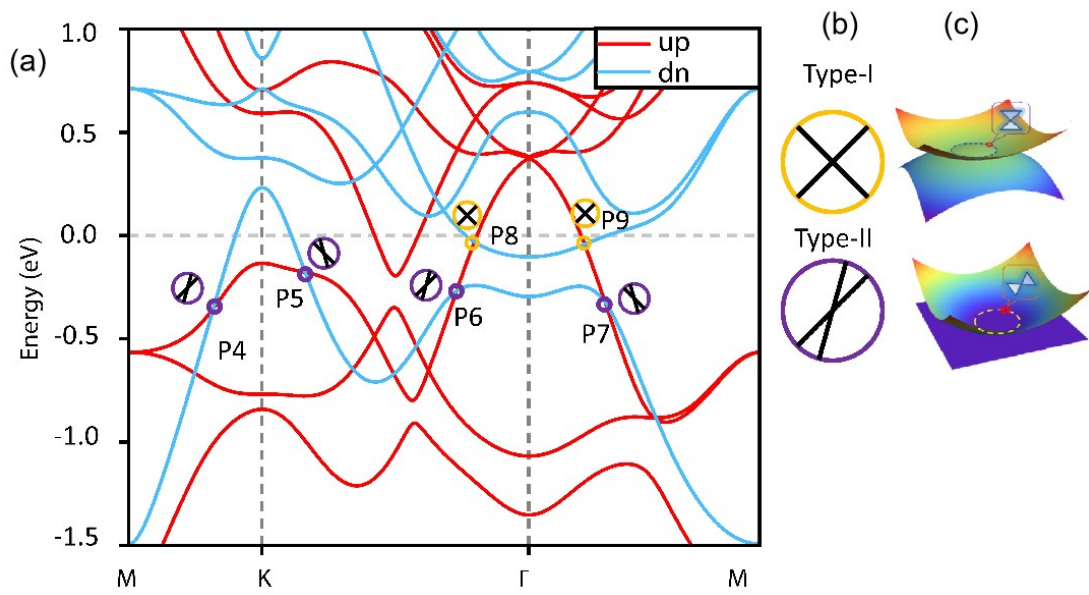

Figure S5 (a) band structures of  $\text{Ti}_3\text{C}_2$ ; (b) type I and type II band crossing points are shown schematically in (b); (c) schematic figure of type I and type II nodal lines (see New J. Phys. 20 (2018) 053019).
